# Supplementary material
Source: Research Square preprint supplement (doi:10.21203/rs.3.rs-9618667/v1)
Supplement: Supplementary file 1 [file 9ccbd76af4e4f5189d9cd5c3.docx]

| Author with funding | Funder name | Grant ID |
| --- | --- | --- |
| Panpan Zhang | Science and Technology Program of Xinjiang Uyghur Autonomous Region | 2024B01017-3 |
| Panpan Zhang | Science and Technology Program of Xinjiang Uyghur Autonomous Region | 2025D01B194 |
| Panpan Zhang | National Natural Science Foundation of China | 52504047 |
| Panpan Zhang | Research Foundation of China University of Petroleum-Beijing at Karamay | XQZX20250028 |
